# Supplementary material
Source: Springer Nature journal article supplement (https://www.springermedizin.de/resource/supplementary/13017_2008_116_MOESM2_ESM.pdf/9635592)
Supplement: MOESM2 [file 9635592]

**INJURY MECHANISM**

**TYPE      INJURY PATTERN      SUB-TYPE      STABILITY      APPROACH**

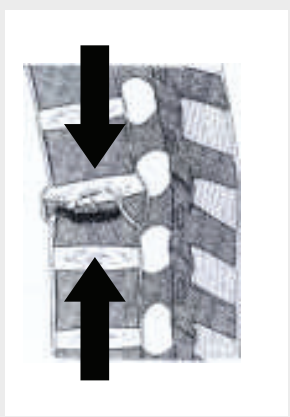

**A**

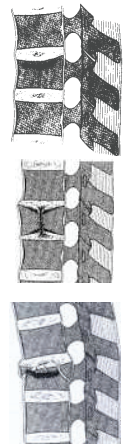

**A1**

**STABLE**

Conservative (Log-Roll)

**A2**

**STABLE**

Conservative (Log-Roll)  
consider secondary anterior surgery  
in A2.3 (pincer) fractures

**A3**

**INSTABLE**

Damage control spine surgery using  
perc. post. Instrument. in A3.2/.3  
Consider conservative in some A3.1

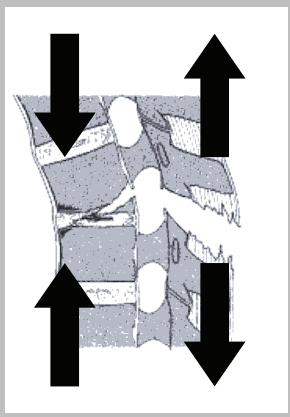

**B**

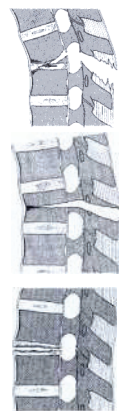

**B1**

**INSTABLE**

Damage control spine surgery using  
perc. post. Instrument. if sufficient  
closed reduction is feasible  
Otherwise and for decompression use  
open approach.  
Consider secondary anterior fusion

**B2**

**INSTABLE**

**B3**

**INSTABLE**

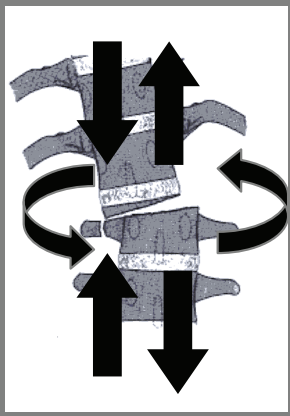

**C**

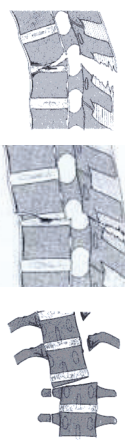

**C1**

**INSTABLE**

Damage control spine surgery using  
open approach in the first place since  
closed reduction is insufficient and  
decompression is needed often. Only  
in rare cases perc. post. Instrument.  
feasible.

**C2**

**INSTABLE**

**C3**

**INSTABLE**

Consider secondary anterior fusion
